# Supplementary material for: Development, Implementation, and Evaluation of an e-Learning in Integrative Oncology for Physicians and Students Involving Experts and Learners: Experiences and Recommendations
Source: Springer Nature journal article supplement (doi:10.1007/s13187-022-02189-1), 2022-07-01

## Journal of Cancer Education

### Development, implementation and evaluation of an e-Learning in integrative oncology for physicians and students involving experts and learners:

#### Experiences and recommendations

Anita V. Thomae, Alizé A. Rogge, Stefanie M. Helmer, Katja Icke, Claudia M. Witt

#### Supplementary material 3: Stepwise development of online learning units

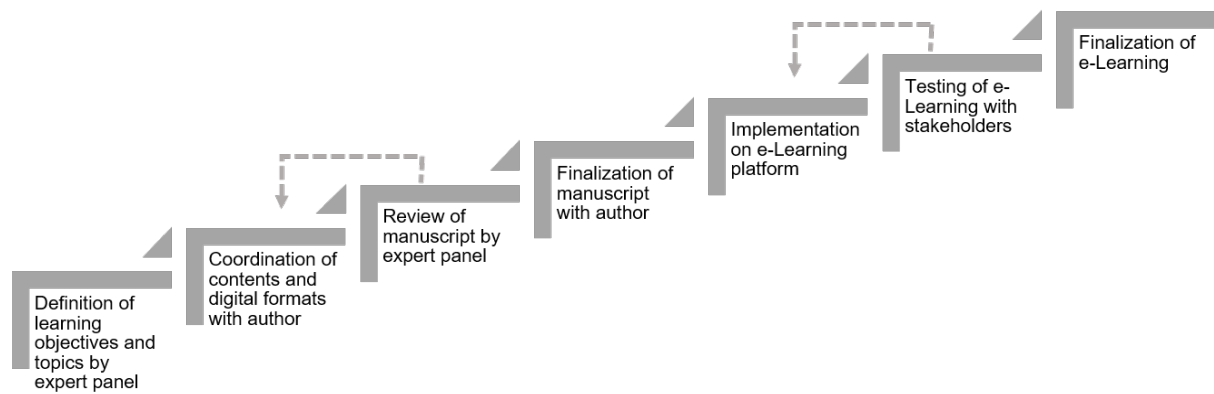

Supplement: MOESM3 [file 23229364]
