# Supplementary material for: Development, Implementation, and Evaluation of an e-Learning in Integrative Oncology for Physicians and Students Involving Experts and Learners: Experiences and Recommendations
Source: Springer Nature journal article supplement (doi:10.1007/s13187-022-02189-1), 2022-07-01
Supplement: MOESM4 [file 23229364]

## Journal of Cancer Education

### Development, implementation and evaluation of an e-Learning in integrative oncology for physicians and students involving experts and learners: Experiences and recommendations

Anita V. Thomae, Alizé A. Rogge, Stefanie M. Helmer, Katja Icke, Claudia M. Witt

#### Supplementary material 4: Evaluation results e-Learning program for oncology physicians.

Items were scored on a categorical scale ranging from 1 (strongly disagree) to 4 (strongly agree). (N=37)

|                                             | % Strongly disagree | % Disagree | % Agree | % Strongly agree |
|---------------------------------------------|---------------------|------------|---------|------------------|
| Interesting content                         | 0                   | 4.8        | 33.3    | 61.9             |
| Subject-relevant content                    | 4.8                 | 9.5        | 38.1    | 47.6             |
| Satisfaction from learning progress         | 4.8                 | 14.3       | 52.4    | 28.6             |
| Usefulness for working with cancer patients | 0                   | 14.3       | 38.1    | 42.9             |
| Easy to understand training materials       | 0                   | 0          | 57.1    | 42.9             |
| Good e-learning in general                  | 4.8                 | 19         | 42.9    | 33.3             |

Results from Witt CM, Helmer SM, Schofield P, Wastell M, Canella C, Thomae AV, et al. Training oncology physicians to advise their patients on complementary and integrative medicine: An implementation study for a manual-guided consultation. *Cancer*. 2020;126(13):3031-41.
